# Supplementary material for: Facile colorimetric detection of alkaline phosphatase activity based on the target-induced valence state regulation of oxidase-mimicking Ce-based nanorods
Source: Royal Society of Chemistry journal article supplement (doi:10.1039/c9tb01515a), 2019-01-01
Supplement: c9tb01515a1.pdf [file c9tb01515a1.pdf]

Electronic Supplementary Information (ESI) for

**Facile colorimetric detection of alkaline phosphatase activity  
based on target-induced valence state regulation of oxidase-  
mimicking Ce-based nanorods**

Hongwei Song,<sup>a,b</sup> Kun Ye,<sup>a</sup> Yinxian Peng,<sup>b,\*</sup> Linjie Wang,<sup>a</sup> Xiangheng Niu<sup>a,\*</sup>

<sup>a</sup> Institute of Green Chemistry and Chemical Technology, School of Chemistry and  
Chemical Engineering, Jiangsu University, Zhenjiang 212013, China

<sup>b</sup> School of Environmental and Chemical Engineering, Jiangsu University of Science  
and Technology, Zhenjiang 212003, China

\* Corresponding authors. E-mail: pyxhx@just.edu.cn; niuxiangheng@126.com

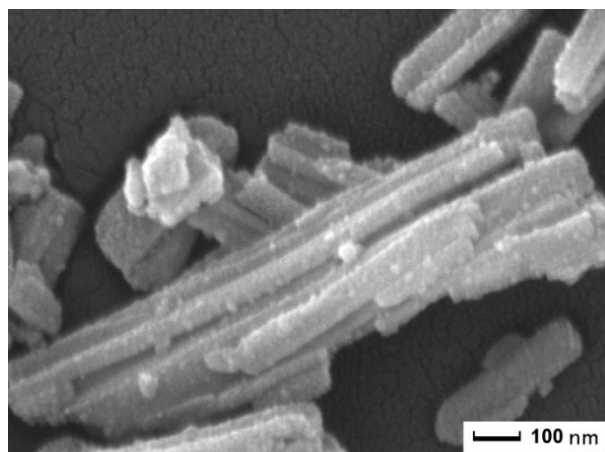

**Figure S1.** SEM image of original Ce-MOF.

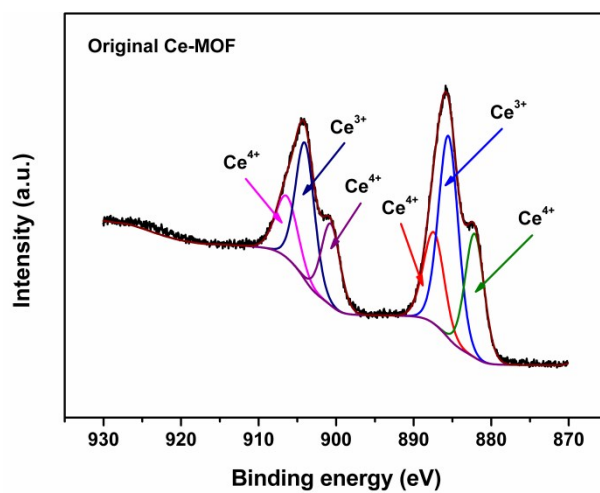

**Figure S2.** Ce 3d XPS of original Ce-MOF.

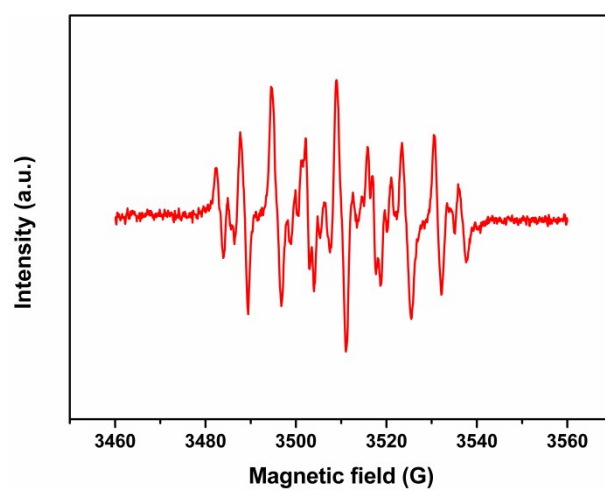

**Figure S3.** EPR pattern of MVCM.

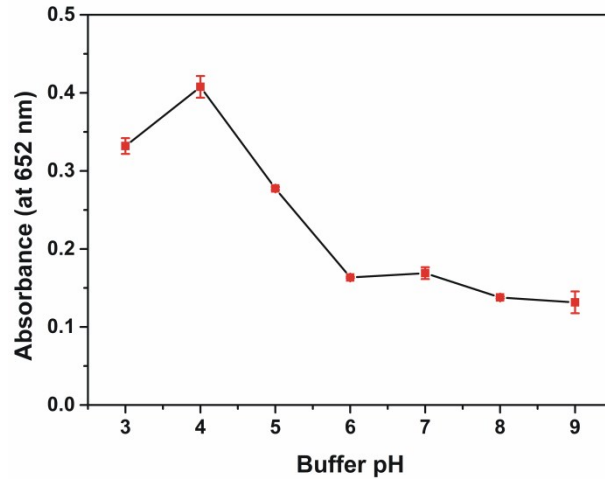

**Figure S4.** Effect of buffer pH on the MVCM+TMB reaction. Buffer: 0.2 M NaAc-HAc with different pH (adjusted by NaOH); TMB concentration: 0.17 mM; MVCM concentration: 0.05 mg mL<sup>-1</sup>; reaction time: 10 min.

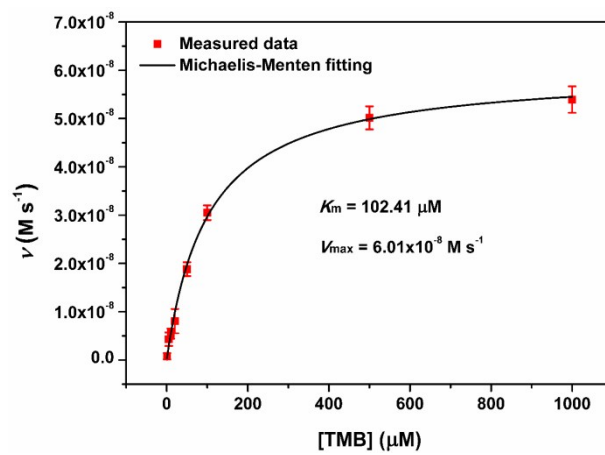

**Figure S5.** Steady-state kinetics measurement of MVCM as an oxidase mimic toward the TMB substrate.

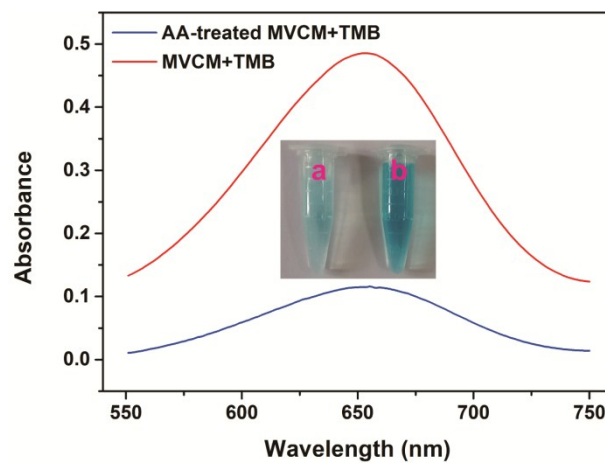

**Figure S6.** UV-Vis spectra of the TMB chromogenic reaction catalyzed by MVCM or AA-treated MVCM (the inset shows the corresponding photograph, a—AA-treated MVCM+TMB, b—MVCM+TMB). TMB concentration: 0.17 mM; MVCM or AA-treated MVCM concentration: 0.05 mg mL<sup>-1</sup>; reaction time: 10 min.

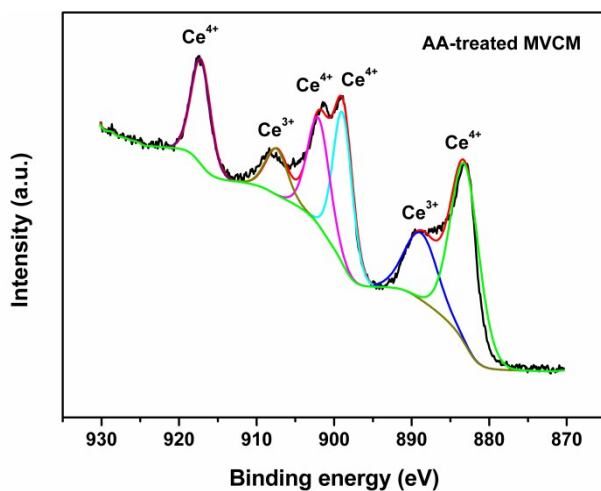

**Figure S7.** Ce 3d XPS of AA-treated MVCM.

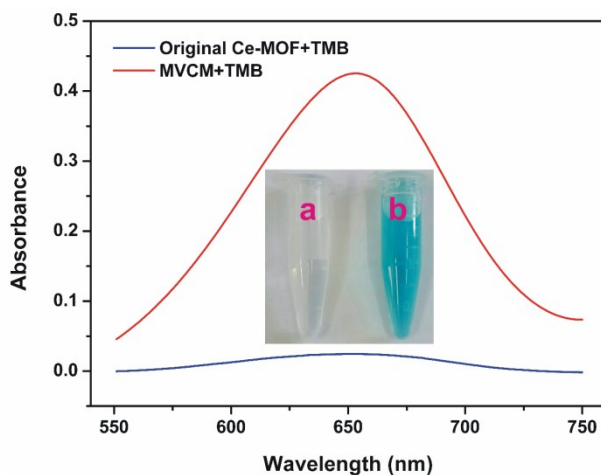

**Figure S8.** UV-Vis spectra of the TMB chromogenic reaction catalyzed by MVCM or original Ce-MOF (the inset shows the corresponding photograph, a—original Ce-MOF+TMB, b—MVCM+TMB). TMB concentration: 0.17 mM; MVCM or original Ce-MOF concentration: 0.05 mg mL<sup>-1</sup>; reaction time: 10 min.

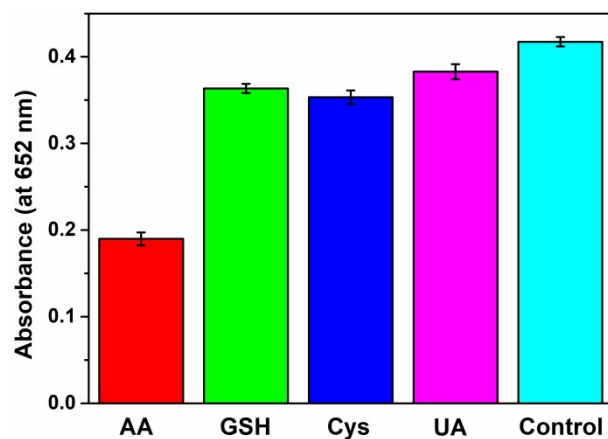

**Figure S9.** Effects of other reducing species (GSH, Cys, and UA) on the AA-suppressed MVCM+TMB reaction. AA, GSH, Cys, or UA concentration: 100  $\mu\text{M}$ ; TMB concentration: 0.17 mM; MVCM concentration: 0.05 mg mL<sup>-1</sup>.

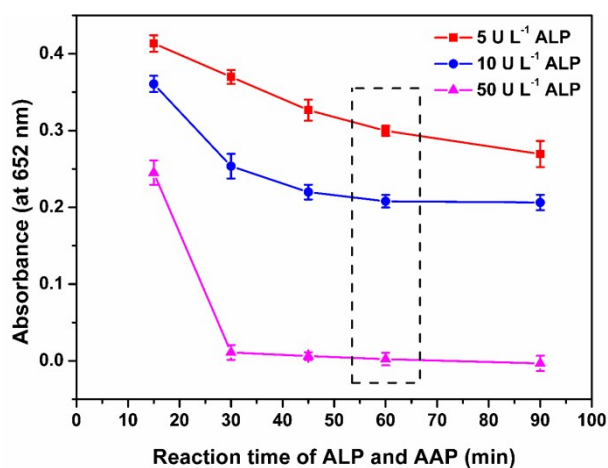

**Figure S10.** Effect of the reaction time of ALP and AAP on ALP activity detection.

**Table S1.** Performance comparison of our strategy with previous approaches for ALP activity sensing.

| Principle                                                                             | Method         | Linear range<br>(U L <sup>-1</sup> ) | LOD<br>(U L <sup>-1</sup> ) | Ref.      |
|---------------------------------------------------------------------------------------|----------------|--------------------------------------|-----------------------------|-----------|
| PPi-triggered competitive displacement of fluorescein-labeled DNA on MVCM             | Fluorescent    | 2~100                                | 0.18                        | [1]       |
| Copper-mediated DNA-scaffolded silver nanocluster switching                           | Fluorescent    | 30~240                               | 5                           | [2]       |
| Inhibition of DNA-templated copper nanoparticles by PPi                               | Fluorescent    | 0.3~7.5                              | 0.3                         | [3]       |
| Quenching and restoration of the fluorescence of CDs                                  | Fluorescent    | 2.5~40                               | 1                           | [4]       |
| PPi-mediated regulation of the fluorescence of CQDs                                   | Fluorescent    | 16.7~782.6                           | 1.1                         | [5]       |
| Eu <sup>3+</sup> -mediated on-off-on phosphorescence of Mn-doped ZnSQDs               | Phosphorescent | 0.15~18                              | 0.065                       | [6]       |
| Fluorogenic reaction of <i>o</i> -phenylenediamine and AA                             | Fluorescent    | 0.1~30                               | 0.06                        | [7]       |
| Target-triggered competitive redox reaction of g-C <sub>3</sub> N <sub>4</sub> /CoOOH | Fluorescent    | 1~30                                 | 0.92                        | [8]       |
| Phosphate-quenched oxidase-like activity of Ce <sup>4+</sup> ions                     | Colorimetric   | 0~50, 50~250                         | 2.3                         | [9]       |
| Target-induced valence state regulation of oxidase-mimicking MVCM                     | Colorimetric   | 0.5~25                               | 0.1                         | This work |

**Table S2.** Recovery results of ALP spiked in serum.

| <b>Sample</b> | <b>Added (U L<sup>-1</sup>)</b> | <b>Measured (U L<sup>-1</sup>)<sup>a</sup></b> | <b>Recovery (%)</b> | <b>RSD (n = 3, %)</b> |
|---------------|---------------------------------|------------------------------------------------|---------------------|-----------------------|
| 1#            | 5                               | 4.47                                           | 89.4                | 6.4                   |
| 2#            | 10                              | 10.39                                          | 103.9               | 5.1                   |
| 3#            | 15                              | 14.76                                          | 98.4                | 5.9                   |
| 4#            | 20                              | 21.10                                          | 105.5               | 4.4                   |
| 5#            | 25                              | 26.37                                          | 105.5               | 5.3                   |

<sup>a</sup> The data were obtained after subtracting the original levels of ALP in human serum.

## References

- [1] C. H. Wang, G. E. Tang and H. L. Tan, *J. Mater. Chem. B* 2018, **6**, 7614-7620.
- [2] J. L. Ma, B. C. Yin, X. Wu and B. C. Ye, *Anal. Chem.* 2016, **88**, 9219-9225.
- [3] L. L. Zhang, J. J. Zhao, M. Duan, H. Zhang, J. H. Jiang and R. Q. Yu, *Anal. Chem.* 2013, **85**, 3797-3801.
- [4] W. J. Kang, Y. Y. Ding, H. Zhou, Q. Y. Liao, X. Yang, Y. G. Yang, J. S. Jiang and M. H. Yang, *Microchim. Acta* 2015, **182**, 1161-1167.
- [5] Z. S. Qian, L. J. Chai, Y. Y. Huang, C. Tang, J. J. Shen, J. R. Chen and H. Feng, *Biosens. Bioelectron.* 2015, **68**, 675-680.
- [6] D. X. Li, J. Qin, Q. Xu and G. Q. Yan, *Sens. Actuators B Chem.* 2018, **274**, 78-84.
- [7] D. Zhao, J. Li, C. Y. Peng, S. Y. Zhu, J. Sun and X. R. Yang, *Anal. Chem.* 2019, **91**, 2978-2984.
- [8] S. G. Liu, L. Han, N. Li, Y. Z. Fan, Y. Z. Yang, N. B. Li and H. Q. Luo, *Sens. Actuators B Chem.* 2019, **283**, 515-523.
- [9] H. W. Song, H. Y. Wang, X. Li, Y. X. Peng, J. M. Pan and X. H. Niu, *Anal. Chim. Acta* 2018, **1044**, 154-161.
